# Supplementary material for: Endothelial cell α-globin and its molecular chaperone α-hemoglobin–stabilizing protein regulate arteriolar contractility
Source: JCI journal article supplement (doi:10.1172/jci99933), 2018-10-07
Supplement: sd1 [file 1]

**Supplemental Figures**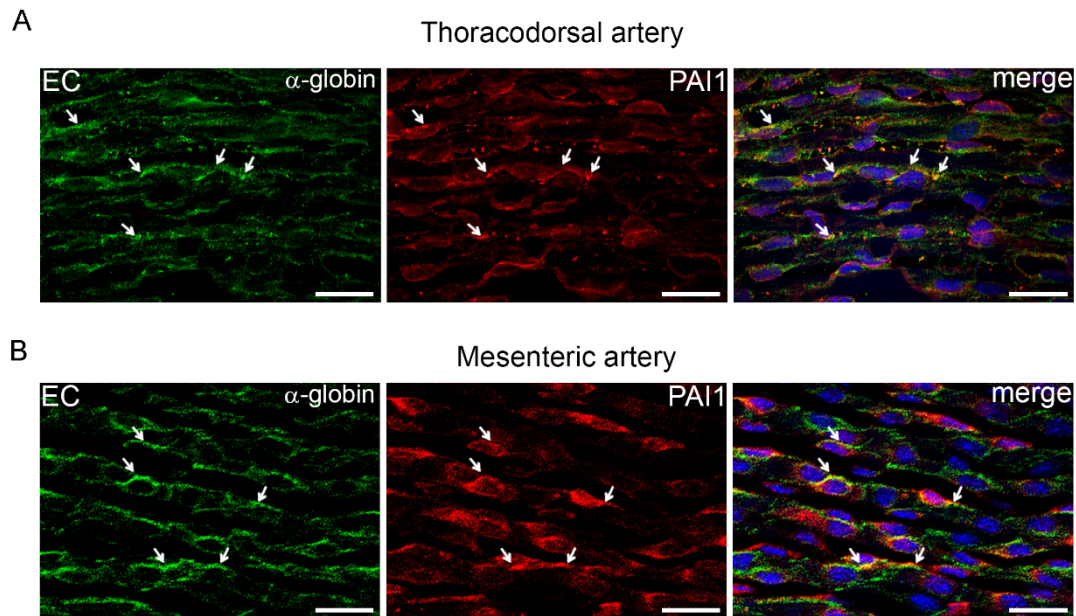

**Supplemental Figure 1.** Indirect immunofluorescence staining for  $\alpha$ -globin and PAI1 (a myoendothelial junction marker) in flat-mount thoracodorsal (**A**) and mesenteric (**B**) artery preparations from 6-month-old wild-type mice. DAPI-stained nuclei appear blue. Images are shown at the same magnification with scale bars equivalent to 25  $\mu$ m.

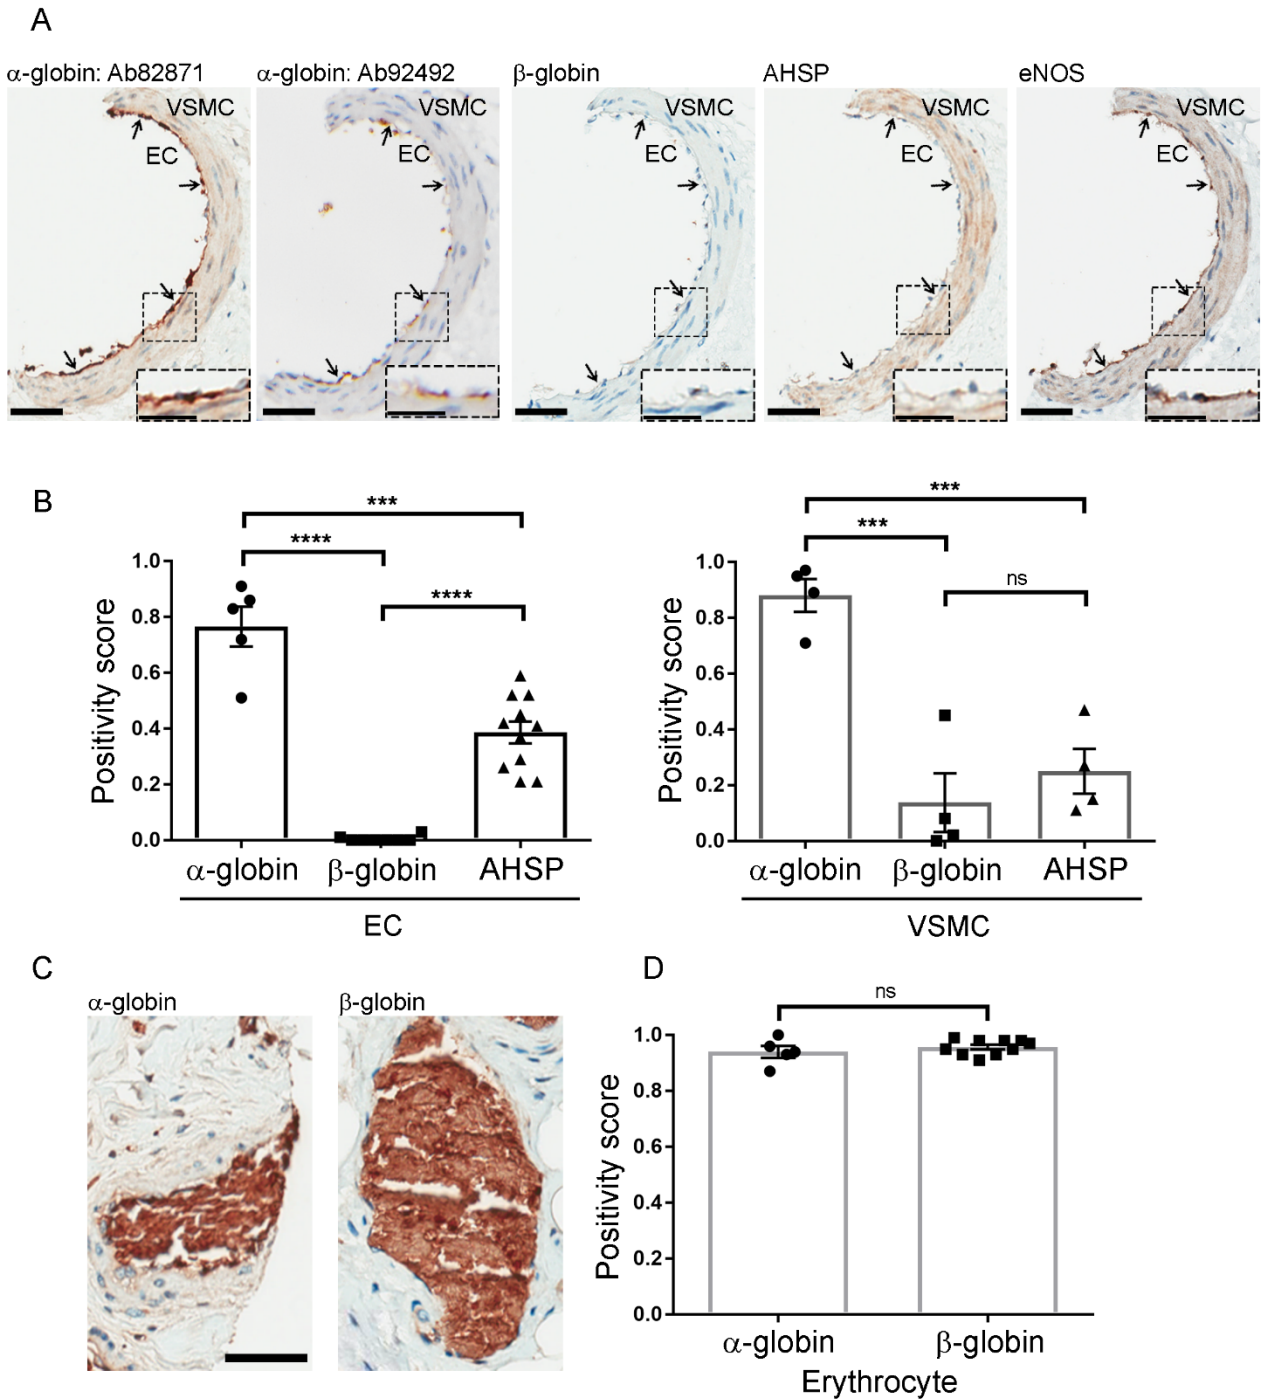

**Supplemental Figure 2.** Immunohistochemical analysis of human coronary arteries. (A) Expression of  $\alpha$ -globin (detected by two different antibodies),  $\beta$ -globin, AHSP, and eNOS in adjacent cross-sections. Note that  $\alpha$ -globin and AHSP (indicated by arrows), but not  $\beta$ -globin, are expressed in endothelial cells (ECs) and vascular smooth muscle cells

(VSMC). Images are shown at the same magnification with scale bars equivalent to 50  $\mu\text{m}$  (main images) and 25  $\mu\text{m}$  (inset rectangles). **(B)** Positivity scores for multiple experiments performed as in panel A, with each symbol representing a sample from a different individual ( $n = 4\text{--}6$ ). **(C)** Expression of  $\alpha$ -globin and  $\beta$ -globin proteins in luminal red blood cells. Images are shown at the same magnification with scale bars equivalent to 50  $\mu\text{m}$ . **(D)** Scatter plot summarizing the positivity scores for multiple experiments performed as in panel C, with each symbol representing a sample from a different individual ( $n = 4\text{--}6$ ). Statistical significance was determined using an unpaired  $t$ -test. \*\*\* $P < 0.005$ ; \*\*\*\* $P < 0.001$ ; ns: not significant.

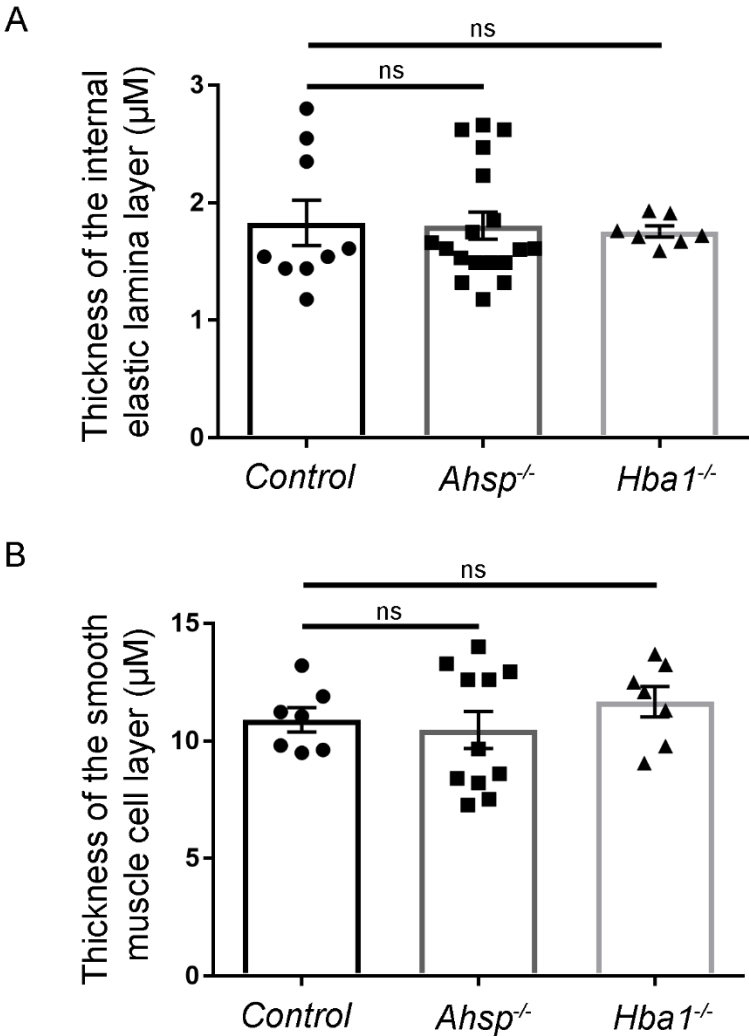

**Supplemental Figure 3.** Thicknesses of the internal elastic lamina (**A**) and the vascular smooth muscle layer (**B**) of TDAs from control (n = 7), *Ahsp*<sup>-/-</sup> (n = 11), and *Hba1*<sup>-/-</sup> (n = 7) mice. Measurements were taken at three separate locations for each artery. Statistical significance was determined using an unpaired *t*-test. ns: not significant.

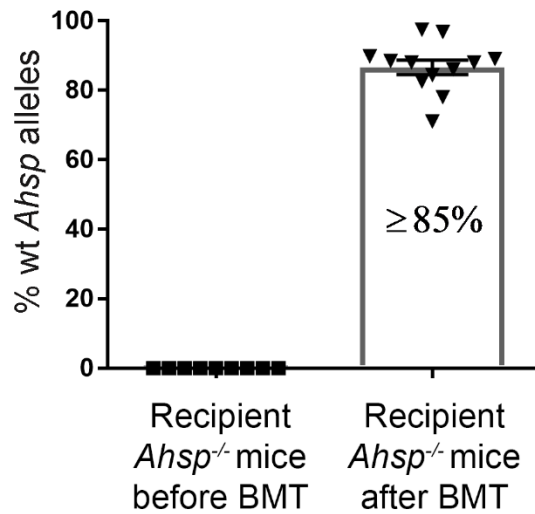

**Supplemental Figure 4.** Hematopoietic reconstitution after bone marrow transplant (BMT). Wild-type bone marrow cells were transplanted into lethally irradiated *Ahsp*<sup>-/-</sup> mice. Four weeks later, donor reconstitution was measured by PCR analysis of circulating mononuclear cells for the presence of WT and mutant *Ahsp* alleles (n = 12) (1).

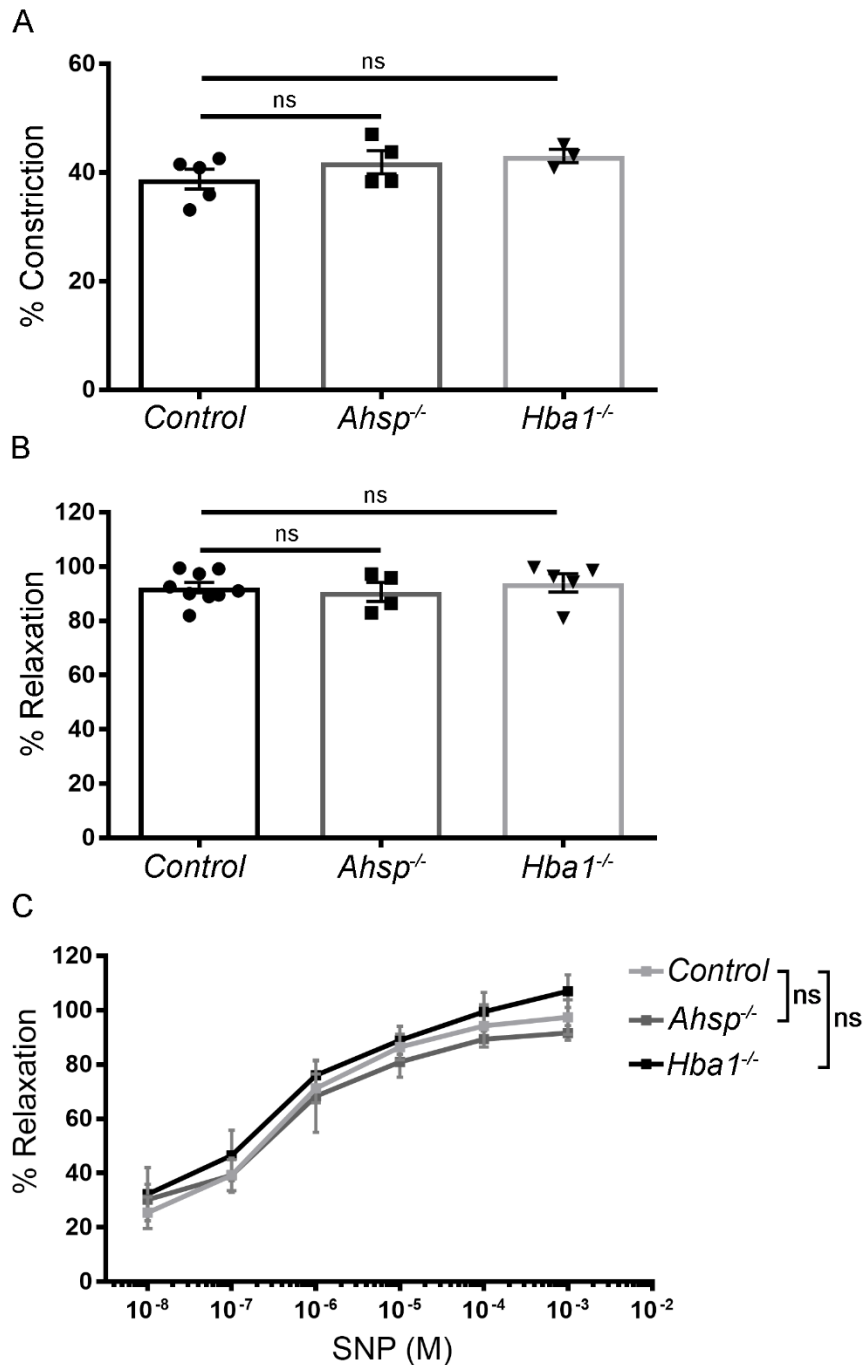

**Supplemental Figure 5.** Smooth muscle contractility, coupling with ECs, and sensitivity to NO are not altered by *Ahsp* or *Hba1* gene disruption. **(A)** Vasoconstriction of thoracodorsal arteries (TDAs) from control (n = 5) and mutant (*Ahsp*<sup>-/-</sup> [n = 4] and *Hba1*<sup>-/-</sup> [n = 3]) mice after treatment with 40 mM KCl. **(B)** Vasodilation of TDAs from control (n = 9) and mutant (*Ahsp*<sup>-/-</sup> [n = 4] and *Hba1*<sup>-/-</sup> [n = 5]) mice after treatment with the intermediate

and small potassium (IK/SK) channel activator NS309 (1  $\mu$ M). **(C)** Vasodilation of TDAs from control (n = 9) and mutant (*Ahsp*<sup>-/-</sup> [n = 4] and *Hba1*<sup>-/-</sup> [n = 5]) mice after treatment with escalating doses of the NO donor sodium nitroprusside (SNP). Statistical significance was determined using an unpaired *t*-test. ns: not significant.

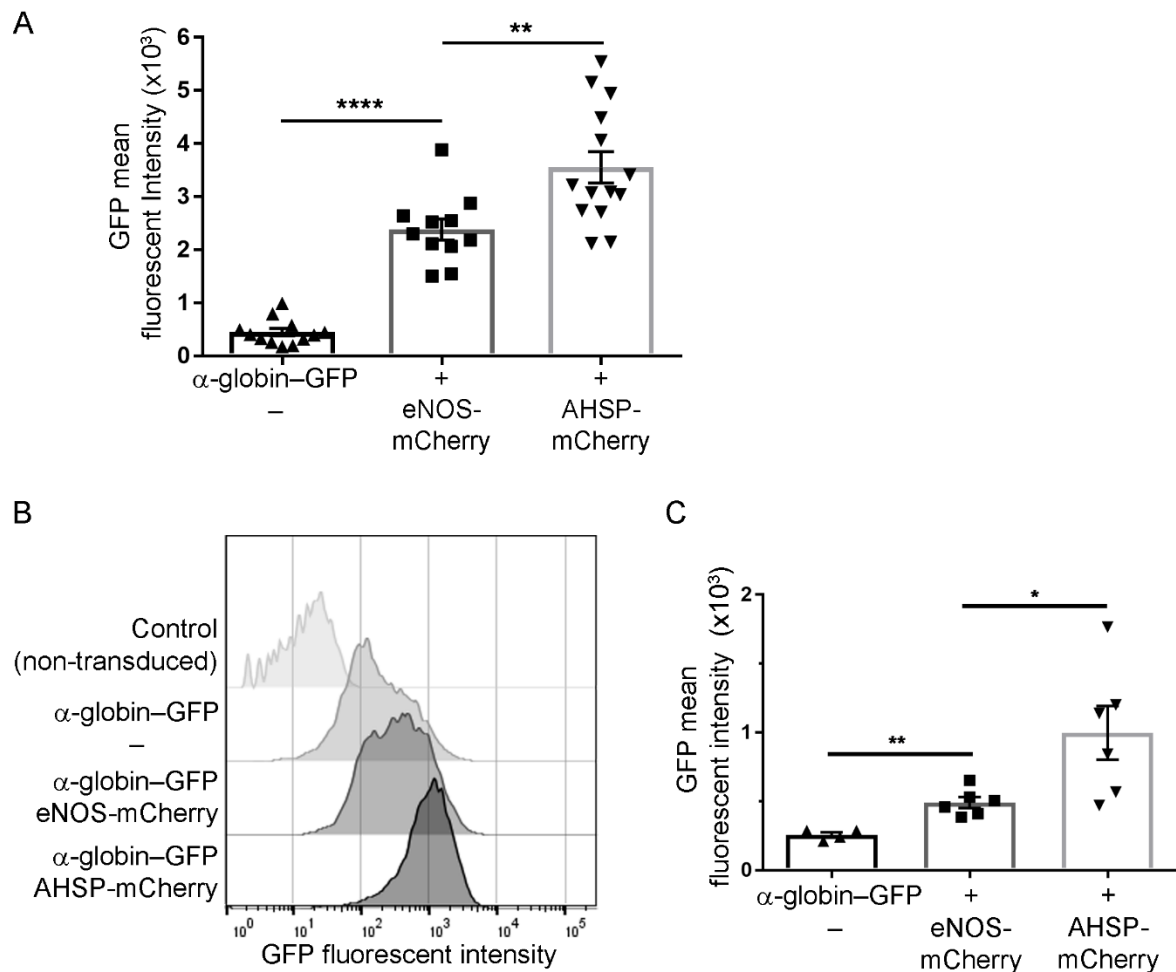

**Supplemental Figure 6.** AHSP or eNOS stabilize  $\alpha$ -globin in ECs. Coronary artery ECs in culture were transduced with lentiviral vectors encoding  $\alpha$ -globin-GFP, AHSP-mCherry, or eNOS-mCherry (see also Figure 5 in the main paper). **(A)** The mean fluorescence intensities of  $\alpha$ -globin-GFP were determined by immunofluorescence microscopy using Nikon NIS-Elements software, version 4.50. The bar chart depicts the mean fluorescence intensity of  $\alpha$ -globin-GFP when expressed alone, with AHSP-mCherry, or with eNOS-mCherry (9–10 fields were assessed for each condition, with approximately 10 cells per field). **(B)** The mean fluorescence intensities of  $\alpha$ -globin-GFP expressed alone, with AHSP-mCherry, or with eNOS-mCherry, as quantified by flow cytometry. **(C)** Summary of the results of multiple flow-cytometry experiments. Statistical significance was determined using an unpaired *t*-test. \**P* < 0.05; \*\**P* < 0.01; \*\*\*\**P* < 0.001.



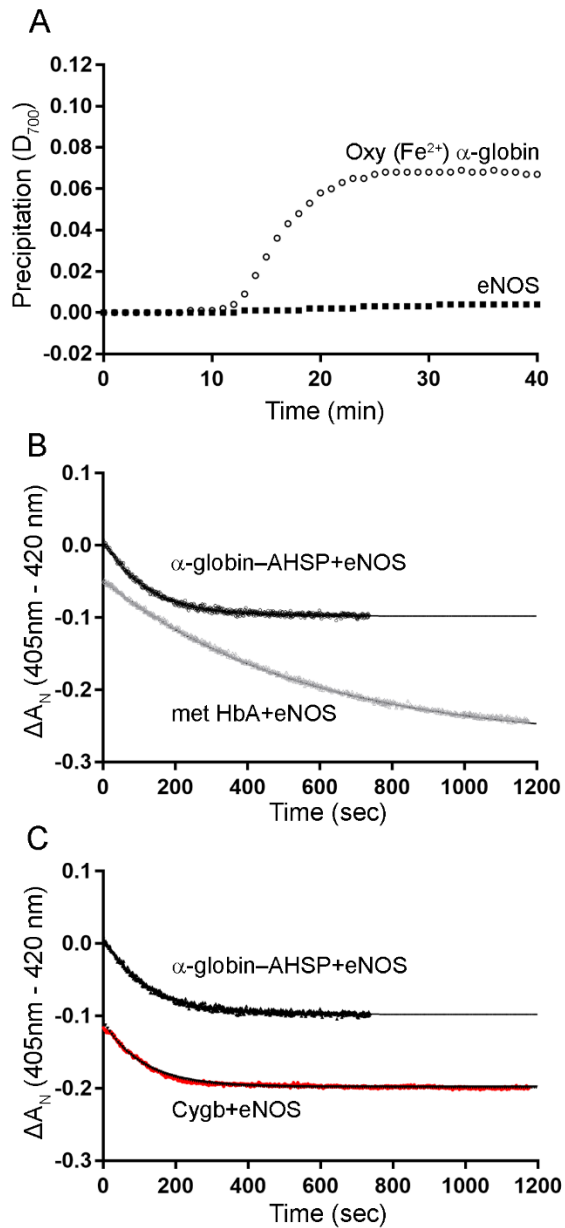

**Supplemental Figure 7.** (A) Oxygenated ( $Fe^{2+}$ )  $\alpha$ -globin (15  $\mu$ M) or full-length recombinant eNOS (15  $\mu$ M) were incubated with potassium ferricyanide (50  $\mu$ M final concentration), and protein precipitation was monitored by light absorbance at 700 nm. (B) Reduction of ( $Fe^{3+}$ )  $\alpha$ -globin-AHSP (0.5  $\mu$ M) or metHbA (1.5  $\mu$ M) by recombinant human eNOS (1  $\mu$ M). (C) Reduction of ( $Fe^{3+}$ )  $\alpha$ -globin-AHSP (0.5  $\mu$ M) or cytoglobin (Cygb, 0.5  $\mu$ M) by recombinant human eNOS (1  $\mu$ M). Reactions for (B) and (C) were performed at 25°C in PBS under anaerobic conditions with 50  $\mu$ M NADPH and 250 U/mL catalase.

A Disruption of the mouse  $\alpha$ -globin gene locus by homologous recombination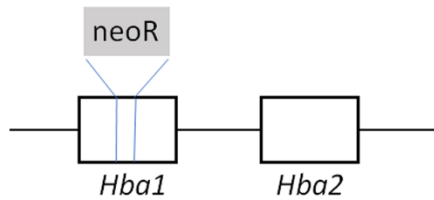B Human common deletions in the  $\alpha$ -globin gene cluster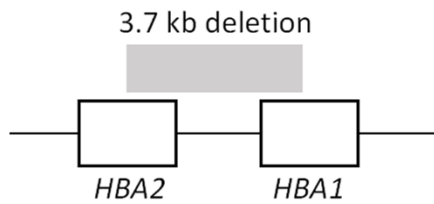

**Supplemental Figure 8.**  $\alpha$ -Globin gene disruptions in the *Hba1*<sup>-/-</sup> mice used in this study (2) (A) and in Kenyan individuals with  $\alpha$ -thalassemia trait examined by Etyang et al. (3) (B). The diagram in panel B is modified from that of Shaji et al. (4).

## References

1. Kihm AJ, Kong Y, Hong W, Russell JE, Rouda S, Adachi K, Simon MC, Blobel GA, and Weiss MJ. An abundant erythroid protein that stabilizes free alpha-haemoglobin. *Nature*. 2002;417(6890):758-63.
2. Chang J, Lu RH, Xu SM, Meneses J, Chan K, Pedersen R, and Kan YW. Inactivation of mouse alpha-globin gene by homologous recombination: mouse model of hemoglobin H disease. *Blood*. 1996;88(5):1846-51.
3. Etyang AO, Khayeka-Wandabwa C, Kapesa S, Muthumbi E, Odipo E, Wamukoya M, Ngomi N, Haregu T, Kyobutungi C, Tendwa M, et al. Blood Pressure and Arterial Stiffness in Kenyan Adolescents With alpha+Thalassemia. *J Am Heart Assoc*. 2017;6(4).
4. Shaji RV, Srivastava A, Chandy M, and Krishnamoorthy R. A single tube multiplex PCR method to detect the common alpha+ thalassemia alleles. *Blood*. 2000;95(5):1879-80.

**Supplementary Table 1.** Antibodies used in this study.

| <b>Antibody</b>                   | <b>Type</b>   | <b>Concentration</b>                                             | <b>Supplier, reference</b>                       |
|-----------------------------------|---------------|------------------------------------------------------------------|--------------------------------------------------|
| <b><math>\alpha</math>-globin</b> | Polyclonal    | 2.5 $\mu$ g/mL (histology, mouse)                                | Abcam, Ab102758                                  |
| <b><math>\alpha</math>-globin</b> | Polyclonal    | 10 $\mu$ g/mL (histology, mouse and human)                       | Abcam, Ab92492                                   |
| <b><math>\alpha</math>-globin</b> | Polyclonal    | 10 $\mu$ g/mL (histology, human)                                 | Abcam, Ab82871                                   |
| <b><math>\alpha</math>-globin</b> | Polyclonal    | (Western blot)                                                   | Home-made                                        |
| <b><math>\beta</math>-globin</b>  | Polyclonal    | 10 $\mu$ g/mL (histology, human)                                 | Novus Biologics NBP2-14081                       |
| <b><math>\beta</math>-globin</b>  | Polyclonal    | 0.2 $\mu$ g/mL (histology)                                       | RayBiotech 119-14366                             |
| <b><math>\beta</math>-globin</b>  | Polyclonal    | 0.2 $\mu$ g/mL (Western blot)                                    | Santa Cruz SC-31116                              |
| <b>AHSP</b>                       | Polyclonal    | 5–10 $\mu$ g/mL (histology, mouse and human)                     | Rockland 100-401-E79S                            |
| <b>AHSP</b>                       | Polyclonal    | 10 $\mu$ g/mL (histology, mouse and human)                       | Abcam, Ab180861                                  |
| <b>AHSP</b>                       | Polyclonal    | (Western blot)                                                   | Home-made                                        |
| <b>eNOS/NOSIII</b>                | Monoclonal    | 1 $\mu$ g/mL (histology, mouse)<br>0.2 $\mu$ g/mL (Western blot) | BD 610297                                        |
| <b>eNOS/NOSIII</b>                | Polyclonal    | 2.5 $\mu$ g/mL (histology, human)                                | Abcam, Ab5589                                    |
| <b>PAI 1</b>                      | Monoclonal    | 1 $\mu$ g/mL (histology, mouse)<br>0.2 $\mu$ g/mL (Western blot) | Abcam, Ab125687                                  |
| <b>Alexa 488</b>                  | Rabbit        | 4 $\mu$ g/mL                                                     | Invitrogen, Life Technologies, A11008            |
| <b>Alexa 594</b>                  | Mouse         | 4 $\mu$ g/mL                                                     | Invitrogen, Life Technologies, A11005            |
| <b>Fibronectin</b>                | Polyclonal    | 200 $\mu$ g/mL                                                   | Santa Cruz, SC-6952                              |
| <b>Laminin</b>                    | Rabbit        | 4100 $\mu$ g/mL                                                  | DAKO, Z0097                                      |
| <b>Goat anti-rabbit IgG</b>       | HRP conjugate | 0.05 $\mu$ g/mL                                                  | Jackson ImmunoResearch Laboratories, 111-035-003 |
| <b>Donkey anti-chicken IgG</b>    | HRP conjugate | 0.05 $\mu$ g/mL                                                  | Jackson ImmunoResearch Laboratories, 703-035-155 |

**Supplementary Table 2.** Red blood cell indices of *Ahsp*<sup>-/-</sup> and *Hba1*<sup>-/-</sup> mice at baseline and six to eight weeks post bone marrow transplant (BMT) with wild-type donor hematopoietic stem and progenitor cells. RDW: red cell distribution width. One-way ANOVA statistical analysis. Statistical significance was determined using unpaired t test. \**P* < 0.05; \*\*\*\**P* < 0.001; ns: not significant.

| Genotype:            | Wild-type    | <i>Ahsp</i> <sup>-/-</sup> | <i>Ahsp</i> <sup>-/-</sup><br>post-BMT | <i>Hba1</i> <sup>-/-</sup> | <i>Hba1</i> <sup>-/-</sup><br>post-BMT |
|----------------------|--------------|----------------------------|----------------------------------------|----------------------------|----------------------------------------|
| n                    | 6            | 6                          | 6                                      | 6                          | 4                                      |
| Hemoglobin<br>(g/dL) | 13.02 ± 0.10 | 12.27 ± 0.34<br>ns         | 13.65 ± 0.22<br>ns                     | 12.32 ± 0.35<br>ns         | 13.3 ± 0.52<br>ns                      |
| RDW<br>(%)           | 13.55 ± 0.20 | 14.63 ± 0.45<br>ns         | 13.83 ± 0.49<br>ns                     | 25.75 ± 1.28<br>****       | 14.4 ± 0.89<br>ns                      |
| Reticulocyte<br>(%)  | 2.38 ± 0.47  | 5.07 ± 1.15<br>*           | 2.85 ± 1.27<br>ns                      | 8.17 ± 0.74<br>****        | 2.62 ± 0.12<br>ns                      |

**Supplementary Table 3.** Oligonucleotide primers used for quantitative RT-qPCR.

| <b>GENE</b>         | <b>FORWARD PRIMER 5'→ 3'</b> | <b>REVERSE PRIMER 5'→ 3'</b> |
|---------------------|------------------------------|------------------------------|
| <b><i>HBA</i></b>   | GCTCTCTGGGGAAGACAAA          | GCCGTGGCTTACATCAAAGT         |
| <b><i>AHSP</i></b>  | GGATCAGCAGGTCTTTGATGA        | TTGCTGGAATTCTGTCATGG         |
| <b><i>HBB</i></b>   | GCTGGTTGTCTACCCTTGA          | GGCTGTCCAAGTGATTCAGG         |
| <b><i>ENOS</i></b>  | GCACCCAGAGCTTTTCTTTG         | GTCAACCGAACGAAGTGACA         |
| <b><i>GAPDH</i></b> | GTGTTCCCTACCCCAATGTG         | AGGAGACAACCTGGTCCTCA         |
| <b><i>ACTB</i></b>  | CCATCTACGAGGGCTATGCT         | TTTGATGTCACGCACGATTT         |
